# Supplementary material for: Human Disease-Associated Genetic Variation Impacts Large Intergenic Non-Coding RNA Expression
Source: PLoS Genet. 2013 Jan 17;9(1):e1003201. doi: 10.1371/journal.pgen.1003201 (PMC3547830; doi:10.1371/journal.pgen.1003201)
Supplement: Table S1 — LincRNA cis-eQTLs in blood and four other non-blood tissues. (XLSX) [file pgen.1003201.s011.xlsx]

## Sheet: Table S1
Table S1. LincRNA cis eQTLs in blood and 4 other non-blood tissues
lincRNA gene Ids according to Cabili et al	Probe name	eQTL P in Blood	r2 in blood	eQTL P in SAT	r2 in SAT	eQTL P in VAT	r2 in VAT	eQTL P in Liver	r2 in Liver	eQTL P in Muscle	r2 in Muscle
XLOC_001197	5080201	9.81343e-198	-0.753296	2.23171e-11	-0.6526	--	--	1.52816e-11	0.693301	--	--
XLOC_002997	3060341	8.97984e-89	0.525104	2.88121e-12	-0.674285	1.83e-11	0.68478	--	--	1.00068e-07	-0.624474
XLOC_014192	430438	5.58164e-78	0.496036	--	--	--	--	--	--	--	--
XLOC_010013	990674	1.58564e-75	0.489266	--	--	--	--	--	--	--	--
XLOC_002275	870551	1.5565e-67	0.464744	--	--	--	--	4.50954e-06	0.510724	1.8988e-11	0.736565
XLOC_013921	6580703	9.01006e-64	-0.452683	--	--	--	--	--	--	--	--
XLOC_005780	4120300	1.20699e-61	0.446116	--	--	--	--	--	--	--	--
XLOC_010052	2490315	5.75766e-57	0.430159	--	--	--	--	--	--	--	--
XLOC_005244	3800358	5.37087e-55	0.423271	--	--	--	--	--	--	--	--
XLOC_006252	3830070	6.83111e-54	0.41883	--	--	--	--	--	--	--	--
XLOC_005681	1440603	2.32132e-49	-0.40207	--	--	--	--	--	--	--	--
XLOC_010043	2230561	1.3752e-48	0.399353	--	--	--	--	--	--	--	--
XLOC_004803	5340278	4.36324e-45	0.384567	--	--	--	--	--	--	--	--
XLOC_007801	4920451	1.09361e-42	-0.374571	--	--	1.18817e-06	-0.521194	8.31607e-07	-0.543401	--	--
MEG3	3360113	2.40057e-35	-0.3415	--	--	--	--	--	--	--	--
XLOC_006742	670494	4.31269e-32	0.326004	--	--	--	--	--	--	--	--
XLOC_009983	6660112	7.67722e-29	0.308884	--	--	--	--	--	--	--	--
XLOC_003853	6960288	3.22405e-21	-0.263985	--	--	--	--	--	--	--	--
XLOC_005681	580452	1.86845e-20	0.258714	--	--	--	--	--	--	--	--
XLOC_007858	3180468	7.80295e-19	0.247901	--	--	--	--	--	--	--	--
XLOC_013921	1990156	1.08486e-18	0.246587	--	--	--	--	--	--	--	--
XLOC_001379	7570474	1.75406e-16	0.231355	--	--	--	--	--	--	--	--
XLOC_013591	2320452	1.44683e-15	-0.224384	--	--	--	--	--	--	--	--
XLOC_007614	5130706	2.60718e-15	0.22163	--	--	--	--	--	--	--	--
XLOC_010236	6840348	6.24986e-15	0.219494	--	--	--	--	--	--	--	--
XLOC_004829	730168	1.9665e-14	0.214957	--	--	--	--	--	--	--	--
XLOC_006259	7210161	1.99261e-12	-0.198124	--	--	--	--	--	--	--	--
XLOC_014107	5220427	4.08945e-11	-0.186007	--	--	--	--	--	--	--	--
XLOC_010202	3140138	4.08945e-11	0.186352	--	--	--	--	--	--	--	--
XLOC_008371	2680201	6.91591e-10	0.173981	--	--	--	--	--	--	--	--
XLOC_005214	3390050	8.67811e-10	-0.173296	--	--	--	--	--	--	--	--
XLOC_005147	380440	5.08397e-09	0.1649	--	--	--	--	--	--	--	--
XLOC_014431	5960541	9.6596e-09	-0.161595	--	--	--	--	--	--	--	--
XLOC_006597	6940288	1.19246e-08	0.160819	--	--	--	--	--	--	--	--
XLOC_001257	4010270	7.52342e-08	0.151568	--	--	--	--	--	--	--	--
XLOC_001457	2760040	9.1724e-08	-0.15068	--	--	--	--	--	--	--	--
XLOC_002908	7050564	7.45191e-07	0.139732	--	--	--	--	--	--	--	--
XLOC_009627	4890097	7.45191e-07	0.140048	--	--	--	--	--	--	--	--
XLOC_011728	290382	8.94191e-07	0.139455	--	--	--	--	--	--	--	--
XLOC_009681	5890348	1.28409e-06	-0.136549	--	--	--	--	--	--	--	--
XLOC_008370	6580477	2.18839e-06	0.133548	--	--	--	--	--	--	--	--
XLOC_012505	6130152	2.60927e-06	-0.133036	--	--	--	--	--	--	--	--
XLOC_001148	3190497	3.10423e-06	-0.132345	--	--	--	--	--	--	--	--
XLOC_000643	3450086	3.68858e-06	0.131377	--	--	--	--	--	--	--	--
XLOC_006516	3850026	3.68858e-06	0.130532	--	--	--	--	--	--	--	--
XLOC_000688	1580113	4.37758e-06	-0.12969	--	--	--	--	--	--	--	--
XLOC_013981	3060044	4.37758e-06	-0.129509	--	--	--	--	--	--	--	--
XLOC_010839	2480634	7.2709e-06	-0.127172	--	--	--	--	--	--	--	--
XLOC_001457	6520689	1.01291e-05	-0.124914	--	--	--	--	--	--	--	--
XLOC_008729	290367	1.19335e-05	0.124193	--	--	--	--	--	--	--	--
XLOC_000555	160296	1.64886e-05	-0.12236	--	--	--	--	--	--	--	--
XLOC_005448	840037	1.64886e-05	-0.12164	--	--	--	--	--	--	--	--
XLOC_011797	6560707	2.65739e-05	-0.11931	3.89886e-12	-0.671312	1.52186e-11	-0.676441	1.95464e-07	-0.568498	--	--
XLOC_009723	3120685	3.10807e-05	0.117742	--	--	--	--	--	--	--	--
XLOC_012187	5860189	3.10807e-05	0.117677	--	--	--	--	--	--	--	--
XLOC_005690	2360494	3.62763e-05	0.116856	--	--	--	--	--	--	--	--
XLOC_013508	1770215	3.62763e-05	0.117439	--	--	--	--	--	--	--	--
XLOC_009897	1710477	4.23263e-05	-0.116307	--	--	--	--	--	--	--	--
XLOC_005394	2320010	4.23263e-05	0.116332	--	--	--	--	--	--	--	--
XLOC_005127	2810670	4.93255e-05	-0.115461	--	--	--	--	--	--	--	--
XLOC_000624	2350010	4.93255e-05	0.114797	--	--	--	--	--	--	--	--
XLOC_003457	780148	4.93255e-05	0.114767	--	--	--	--	--	--	--	--
XLOC_007475	4920333	6.66888e-05	-0.113305	--	--	--	--	--	--	--	--
XLOC_009878	2470347	6.66888e-05	-0.112853	--	--	--	--	--	--	--	--
XLOC_000352	3180274	6.66888e-05	0.113444	--	--	--	--	--	--	--	--
XLOC_001265	3520215	6.66888e-05	0.112679	--	--	--	--	--	--	--	--
XLOC_001605	2900598	6.66888e-05	0.113488	--	--	--	--	--	--	--	--
XLOC_005520	2140187	6.66888e-05	0.112835	--	--	--	--	--	--	--	--
XLOC_000914	460133	7.7436e-05	-0.112159	--	--	--	--	--	--	--	--
XLOC_008349	2600048	7.7436e-05	-0.111647	--	--	--	--	--	--	--	--
XLOC_014086	7650040	7.7436e-05	-0.112414	--	--	--	--	--	--	--	--
XLOC_010017	3940064	7.7436e-05	0.111815	--	--	--	--	--	--	--	--
XLOC_010461	6060068	8.97321e-05	-0.11059	--	--	--	--	--	--	--	--
XLOC_014114	150484	8.97321e-05	-0.111417	--	--	--	--	--	--	--	--
XLOC_001945	4900246	8.97321e-05	0.110544	--	--	--	--	--	--	--	--
XLOC_003775	130253	8.97321e-05	0.110535	--	--	--	--	--	--	--	--
XLOC_010338	4480762	8.97321e-05	0.111174	--	--	--	--	--	--	--	--
XLOC_003407	6040020	0.000103942	0.110375	--	--	--	--	--	--	--	--
XLOC_006446	4810553	0.000103942	0.109636	--	--	--	--	--	--	--	--
XLOC_006505	5670753	0.000103942	0.109555	--	--	--	--	--	--	--	--
XLOC_013588	940528	0.000103942	0.109698	--	--	--	--	--	--	--	--
XLOC_004320	460612	0.00012016	-0.108556	--	--	--	--	--	--	--	--
XLOC_007538	2600274	0.00012016	-0.109157	--	--	--	--	--	--	--	--
XLOC_002886	2470543	0.00012016	0.108735	--	--	--	--	--	--	--	--
XLOC_008385	6900102	0.00012016	0.108771	--	--	--	--	--	--	--	--
XLOC_013938	2680360	0.00012016	0.109086	--	--	--	--	--	--	--	--
XLOC_011616	1340332	0.000138854	-0.108478	--	--	--	--	--	--	--	--
XLOC_000042	5670392	0.000160136	-0.10723	--	--	--	--	--	--	--	--
XLOC_014331	4040603	0.000160136	-0.106729	--	--	--	--	--	--	--	--
XLOC_001470	6370491	0.000160136	0.106738	--	--	--	--	--	--	--	--
XLOC_002247	5890612	0.000160136	0.107382	--	--	--	--	--	--	--	--
XLOC_005602	3780373	0.000160136	0.106917	--	--	--	--	--	--	--	--
XLOC_007648	520735	0.000160136	0.107236	--	--	--	--	--	--	--	--
XLOC_014279	3800370	0.000160136	0.107007	--	--	--	--	--	--	--	--
XLOC_000922	940184	0.00018446	-0.1061	--	--	--	--	--	--	--	--
XLOC_002026	2360450	0.00018446	-0.106251	--	--	--	--	--	--	--	--
XLOC_005863	6520711	0.00018446	-0.105521	--	--	--	--	--	--	--	--
XLOC_006929	3180349	0.00018446	0.105886	--	--	--	--	--	--	--	--
XLOC_004331	5390678	0.000212394	-0.104517	--	--	--	--	--	--	--	--
XLOC_000818	6290722	0.000212394	0.105081	--	--	--	--	--	--	--	--
XLOC_004154	1440102	0.000212394	0.105414	--	--	--	--	--	--	--	--
XLOC_004309	3130279	0.000212394	0.105022	--	--	--	--	--	--	--	--
XLOC_006277	4860746	0.000212394	0.105356	--	--	--	--	--	--	--	--
XLOC_008863	4570100	0.000212394	0.104736	--	--	--	--	--	--	--	--
XLOC_009944	5870471	0.000212394	0.105312	--	--	--	--	--	--	--	--
XLOC_014356	3170056	0.000212394	0.105043	--	--	--	--	--	--	--	--
MEG3	3710730	0.000212394	-0.104506	--	--	--	--	--	--	--	--
XLOC_000909	5870196	0.000244073	-0.103788	--	--	--	--	--	--	--	--
XLOC_004708	460170	0.000244073	-0.104451	--	--	--	--	--	--	--	--
XLOC_010657	1450541	0.000244073	-0.103846	--	--	--	--	--	--	--	--
XLOC_011938	4880341	0.000244073	-0.104438	--	--	--	--	--	--	--	--
XLOC_003864	3930519	0.000244073	0.103897	--	--	--	--	--	--	--	--
XLOC_009401	610364	--	--	2.52341e-21	0.819652	2.78921e-13	0.714948	--	--	--	--
XLOC_013825	7000202	--	--	5.5941e-11	0.642894	1.52791e-08	0.591111	--	--	8.43135e-09	0.662176
XLOC_013898	1400753	--	--	1.08891e-09	-0.607952	2.49454e-13	-0.715509	--	--	--	--
XLOC_012496	1770424	--	--	2.99631e-09	0.594568	1.56306e-06	0.515698	--	--	--	--
XLOC_014388	2030242	--	--	2.7328e-07	-0.528511	--	--	--	--	--	--
XLOC_007413	5870706	--	--	8.44467e-07	0.510103	--	--	--	--	--	--
XLOC_004804	6840201	--	--	2.07684e-06	-0.494127	--	--	--	--	--	--
XLOC_003904	4290767	--	--	3.19917e-06	0.48633	--	--	--	--	--	--
XLOC_002175	1580180	--	--	5.41581e-06	0.475831	--	--	--	--	--	--
XLOC_009725	7050725	--	--	6.31974e-06	-0.472681	--	--	--	--	--	--
XLOC_005595	1410138	--	--	6.64981e-06	-0.471817	--	--	--	--	--	--
XLOC_013489	5220750	--	--	1.1556e-05	0.461257	--	--	--	--	--	--
XLOC_013583	1230678	--	--	1.21432e-05	0.460286	--	--	--	--	--	--
XLOC_007606	4730717	--	--	--	--	--	--	1.84016e-07	0.56876	--	--
XLOC_006683	3360576	--	--	--	--	--	--	9.28578e-07	-0.541334	--	--
XLOC_012885	4540603	--	--	--	--	--	--	5.23856e-06	0.508498	--	--
XLOC_000957	4590286	--	--	--	--	--	--	6.37965e-06	0.504239	--	--
XLOC_013657	2570170	--	--	--	--	--	--	--	--	1.80423e-06	0.572467
r2: Proportion of lincRNA expression variance explained
