# Supplementary material for: Human Disease-Associated Genetic Variation Impacts Large Intergenic Non-Coding RNA Expression
Source: PLoS Genet. 2013 Jan 17;9(1):e1003201. doi: 10.1371/journal.pgen.1003201 (PMC3547830; doi:10.1371/journal.pgen.1003201)
Supplement: Table S3 — Identification of co-expressed genes for lincRNA LOC389641 using GeneNetwork. (XLSX) [file pgen.1003201.s013.xlsx]

## Sheet: Table S3
Table S3. Identification of coexpressed genes using GeneNetwork
LincRNA gene	coexpressed genes	coexpressed gene Ensemble ID	chr	start	stop	z-score	P-value
XLOC_006742 (LOC389641)	TNFRSF10A	ENSG00000104689	8	23047965	23082639	13.1	3.29258e-39
	AL157902.3	ENSG00000236866	1	118139454	118148392	4.78	1.75295e-06
	AC074389.9	ENSG00000236081	7	1778266	1781927	5.05	4.4181e-07
	TNFRSF10D	ENSG00000173530	8	22993101	23021543	4.94	7.81226e-07
	CHMP7	ENSG00000147457	8	23101150	23119512	5.32	1.03767e-07
	TLX1NB	ENSG00000236311	10	102849078	102901023	4.74	2.13718e-06
	CNOT7	ENSG00000198791	8	17086737	17104387	4.6	4.22491e-06
	RP11-115C21.2	ENSG00000246089	8	6261072	6264663	4.57	4.87724e-06
	C11orf94	ENSG00000234776	11	45928085	45928833	4.57	4.87724e-06
	PPEF2	ENSG00000156194	4	76781020	76823724	3.93	8.49459e-05
	RP11-63B19.1	ENSG00000236720	1	177669659	177679465	4.67	3.012e-06
	AC073321.4	ENSG00000225794	2	217469494	217475925	4.16	3.18248e-05
	ELP3	ENSG00000134014	8	27947190	28048673	4.65	3.31935e-06
	ANKRD5	ENSG00000132623	20	10015689	10037410	4.04	5.34512e-05
	CTC-378H22.1	ENSG00000254887	19	42636707	42641251	4.04	5.34512e-05
	AC109333.10	ENSG00000227495	17	4922509	4923388	3.96	7.49498e-05
	PPP2R2A	ENSG00000221914	8	26149007	26230196	3.95	7.81512e-05
	INTS10	ENSG00000104613	8	19674651	19709594	3.94	8.14816e-05
	CTD-2303B20.1	ENSG00000259073	14	90042560	90043821	-3.9	9.61927e-05
	AC002480.5	ENSG00000225541	7	22611226	22701411	3.9	9.61927e-05
	CTC-378H22.2	ENSG00000259436	19	42656721	42661675	4.36	1.30062e-05
	RP11-426A6.5	ENSG00000226706	9	138395119	138398293	4.24	2.2352e-05
	AC007038.7	ENSG00000229127	2	210895457	210929080	-4.23	2.33691e-05
	VPS37A	ENSG00000155975	8	17104080	17159936	4.11	3.95659e-05
	ITIH5L	ENSG00000102313	23	54775332	54824673	-4.03	5.57769e-05
